# Supplementary material for: An electrodeposited cobalt–selenide-based film as an efficient bifunctional electrocatalyst for full water splitting
Source: Royal Society of Chemistry journal article supplement (doi:10.1039/c6ta03788g), 2016-01-01
Supplement: c6ta03788g1.pdf [file c6ta03788g1.pdf]

### Electronic Supplementary Information(ESI†)

#### Electrodeposited cobalt-selenide-based film as an efficient bifunctional electrocatalyst for full water splitting

Xiujuan Xu, Puyu Du, Zongkun Chen, Minghua Huang\*

Institute of Materials Science and Engineering, Ocean University of China, Qingdao 266100

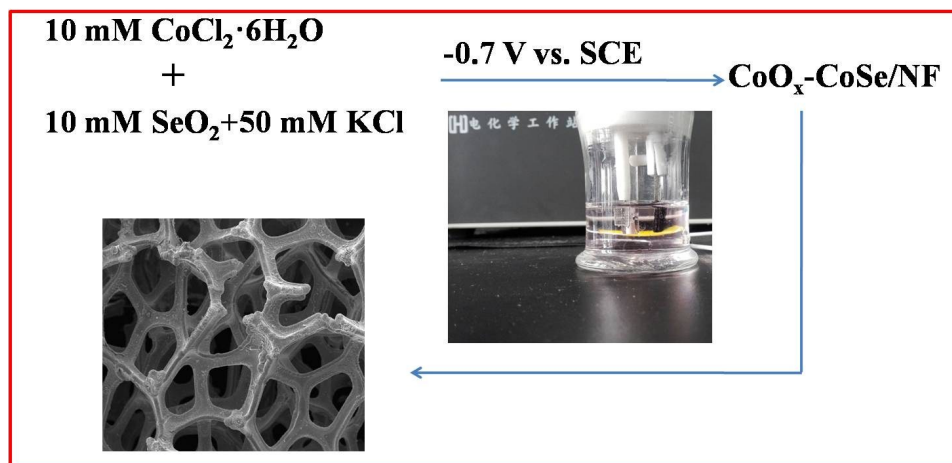

**Scheme S1** The synthesis process of the  $\text{CoO}_x\text{-CoSe}$  film on NF.

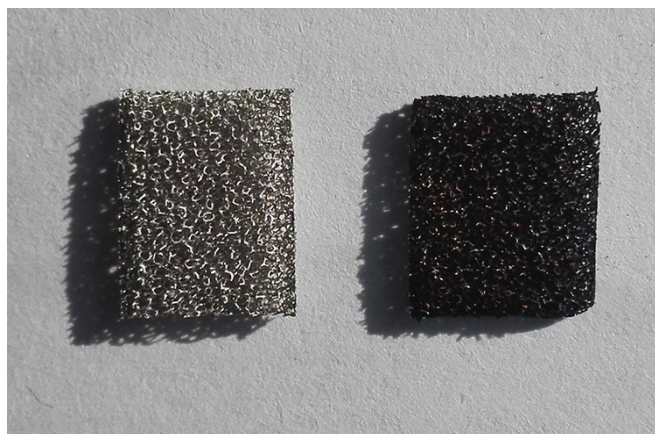

**Fig. S1** Optical photographs of the NF substrate (left) and the  $\text{CoO}_x\text{-CoSe/NF}$  film on NF (right).

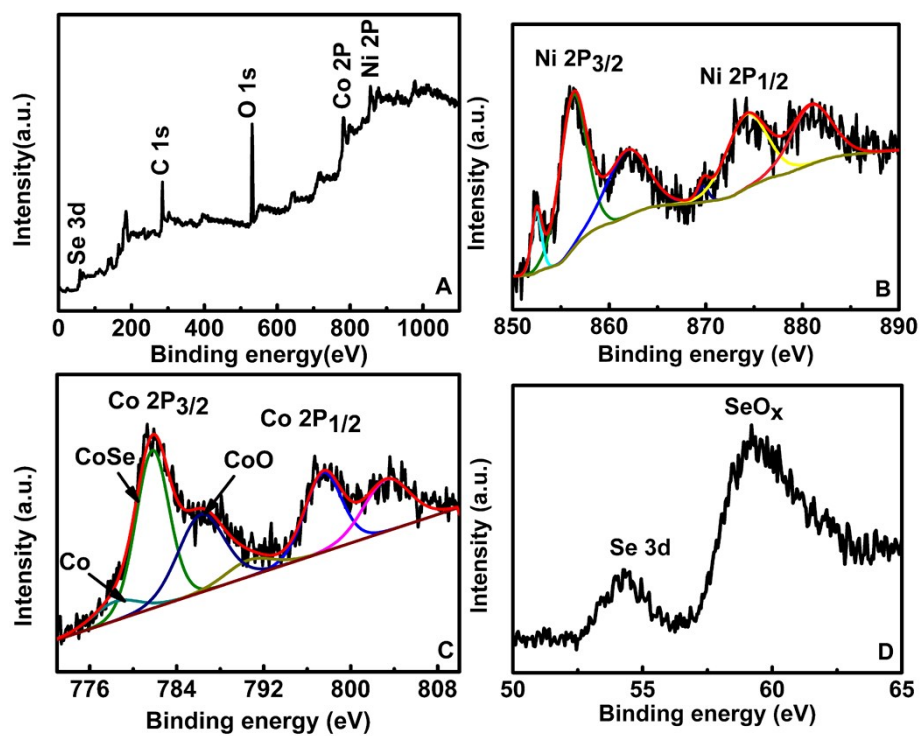

**Fig. S2** (A) XPS survey spectrum for the CoO<sub>x</sub>-CoSe film on NF. (B, C and D) High resolution XPS spectra of Ni 2P, Co 2p and Se 3d, respectively.

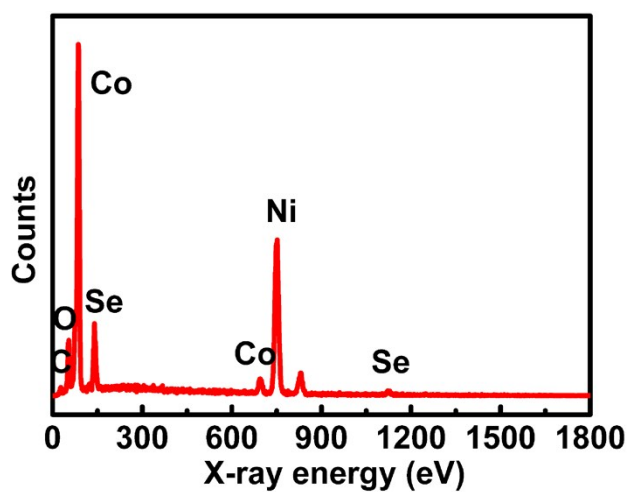

**Fig. S3** EDS spectrum of the CoO<sub>x</sub>-CoSe film on NF.

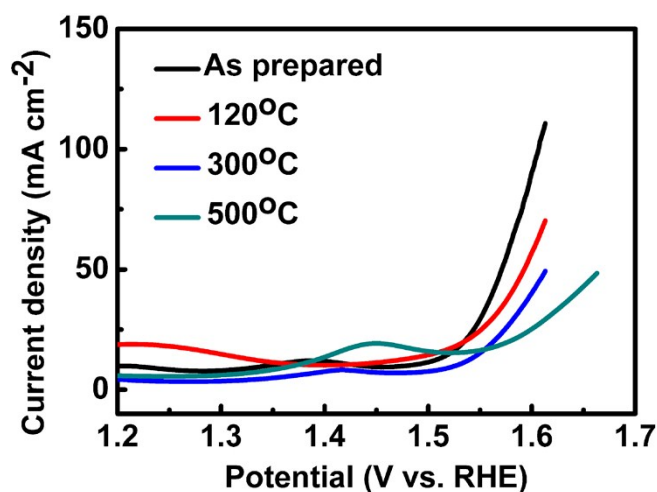

**Fig. S4** OER polarization curves of the  $\text{CoO}_x\text{-CoSe}$  film electrode obtained at different annealing temperature.

**Table S1** Comparison of the electrocatalytic OER activity of the  $\text{CoO}_x\text{-CoSe/NF}$  with other non-noble OER catalysts recently reported in alkaline solutions.

| Catalyst                              | Current density $j$ ( $\text{mA cm}^{-2}$ ) | $\eta$ (mV vs. RHE) at corresponding $j$ | Tafel slope ( $\text{mV dec}^{-1}$ ) | Electrolyte | Reference                                               |
|---------------------------------------|---------------------------------------------|------------------------------------------|--------------------------------------|-------------|---------------------------------------------------------|
| $\text{CeO}_2/\text{CoSe}_2$          | 10                                          | 288                                      | 44                                   | 0.1 M KOH   | <i>Small</i> , 2015, <b>11</b> , 182.                   |
| $\text{CoSe}_2$ sheets                | 73                                          | 470                                      | 64                                   | 0.1 M KOH   | <i>Angew. Chem. Int. Ed.</i> , 2015, <b>54</b> , 12004. |
| NG- $\text{CoSe}_2$                   | 10                                          | 366                                      | 40                                   | 0.1 M KOH   | <i>ACS Nano.</i> , 2014, <b>8</b> , 3970                |
| $\text{CoSe}_2$ ultrathin nanosheets  | 10                                          | 320                                      | 44                                   | 0.1 M KOH   | <i>J. Am. Chem. Soc.</i> , 2014, <b>136</b> , 15670.    |
| $\text{Mn}_3\text{O}_4/\text{CoSe}_2$ | 10                                          | 450                                      | 49                                   | 0.1 M KOH   | <i>J. Am. Chem. Soc.</i> , 2012, <b>134</b> , 2930.     |
| $\text{Ni}_3\text{S}_2/\text{Ni}$     | 10                                          | 187                                      | 159.3                                | 0.1 M KOH   | <i>Energy Environ. Sci.</i> , 2013, <b>6</b> , 2921.    |
| NiCo LDH                              | 20                                          | 393                                      | 40                                   | 1.0 M KOH   | <i>Nano Lett.</i> , 2015, <b>15</b> , 1421.             |
| $\text{CoO}_x\text{-CoSe}$ film on NF | 100<br>500                                  | 300<br>380                               | 68                                   | 1.0 M KOH   | This work                                               |

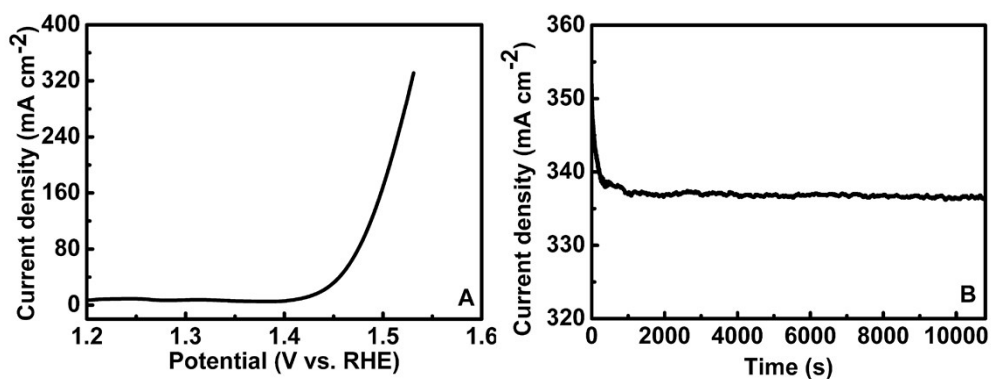

**Fig. S5** (A) OER polarization curve for the  $\text{CoO}_x\text{-CoSe}$  film in 10 M KOH with a scan rate of  $5 \text{ mV s}^{-1}$ . (B) Time-dependent current density curve for the  $\text{CoO}_x\text{-CoSe}$  film under a fixed potential in 10 M KOH.

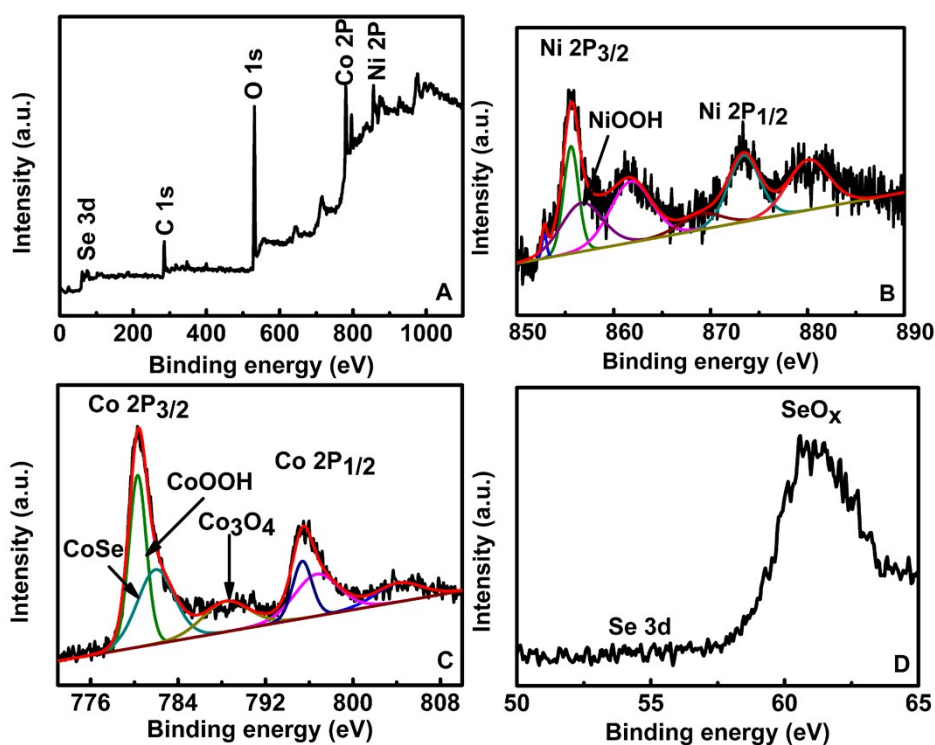

**Fig. S6** (A) XPS survey spectrum for the  $\text{CoO}_x\text{-CoSe}$  film on NF after OER electrolysis. (B, C and D) High resolution XPS spectra of Ni 2P, Co 2p and Se 3d after OER electrolysis, respectively.

**Table S2** Comparison of the electrocatalytic HER performance of the CoO<sub>x</sub>-CoSe/NF with other non-noble OER catalysts recently reported in alkaline solutions.

| Catalyst                               | Current density j (mA cm <sup>-2</sup> ) | η (mV vs. RHE) at corresponding j | Tafel slope (mV dec <sup>-1</sup> ) | Electrolyte                          | Reference                                                   |
|----------------------------------------|------------------------------------------|-----------------------------------|-------------------------------------|--------------------------------------|-------------------------------------------------------------|
| NiCo <sub>2</sub> S <sub>4</sub> NA/CC | 50                                       | 263                               | 141                                 | 1.0 M KOH                            | <i>Nanoscale</i> , 2015, <b>7</b> , 15122.                  |
| Ni <sub>3</sub> S <sub>2</sub> /NF     | 10                                       | 223                               | -                                   | alkaline media (pH=14)               | <i>J. Am. Chem. Soc.</i> , 2015, <b>137</b> , 14023.        |
| Ni-P/Cu foam                           | 10                                       | 98                                | 55                                  | 1.0 M KOH                            | <i>J. Power Sources</i> , 2015, <b>299</b> , 342.           |
| Ni <sub>5</sub> P <sub>4</sub>         | 10                                       | 150                               | 53                                  | 1.0 M KOH                            | <i>Angew. Chem. Int. Ed.</i> , 2015, <b>54</b> , 12361.     |
| NiS/NF                                 | 20                                       | 158                               | 83                                  | 1.0 M KOH                            | <i>Chem. Commun.</i> , 2016, <b>52</b> , 1486.              |
| CoSe <sub>2</sub> NW/CC                | 10                                       | 130                               | 32                                  | 0.5 M H <sub>2</sub> SO <sub>4</sub> | <i>ACS Appl. Mater. Interfaces</i> , 2015, <b>7</b> , 3877. |
| CoSe/Ti                                | 10                                       | 135                               | 62                                  | 0.5 M H <sub>2</sub> SO <sub>4</sub> | <i>J. Mater. Chem. A</i> , 2014, <b>2</b> , 13835.          |
| CoO <sub>x</sub> -CoSe film on NF      | 10                                       | 90                                | 94                                  | 1.0 M KOH                            | This work                                                   |

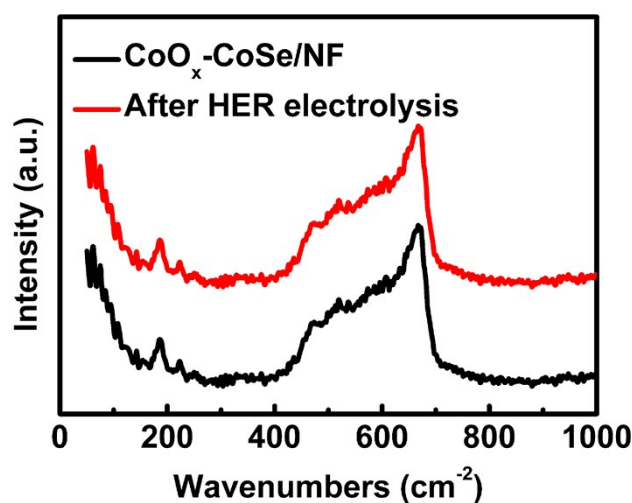

**Fig. S7** Raman patterns of the CoO<sub>x</sub>-CoSe film before and after HER test.
